# Supplementary material for: Impact of superparamagnetic iron oxide nanoparticles on in vitro and in vivo radiosensitisation of cancer cells
Source: PubMed Central journal article supplement (PMC8199842; doi:10.1186/s13014-021-01829-y), 2021-06-12
Supplement: 13014_2021_1829_MOESM1_ESM.pdf [file 13014_2021_1829_MOESM1_ESM.pdf]

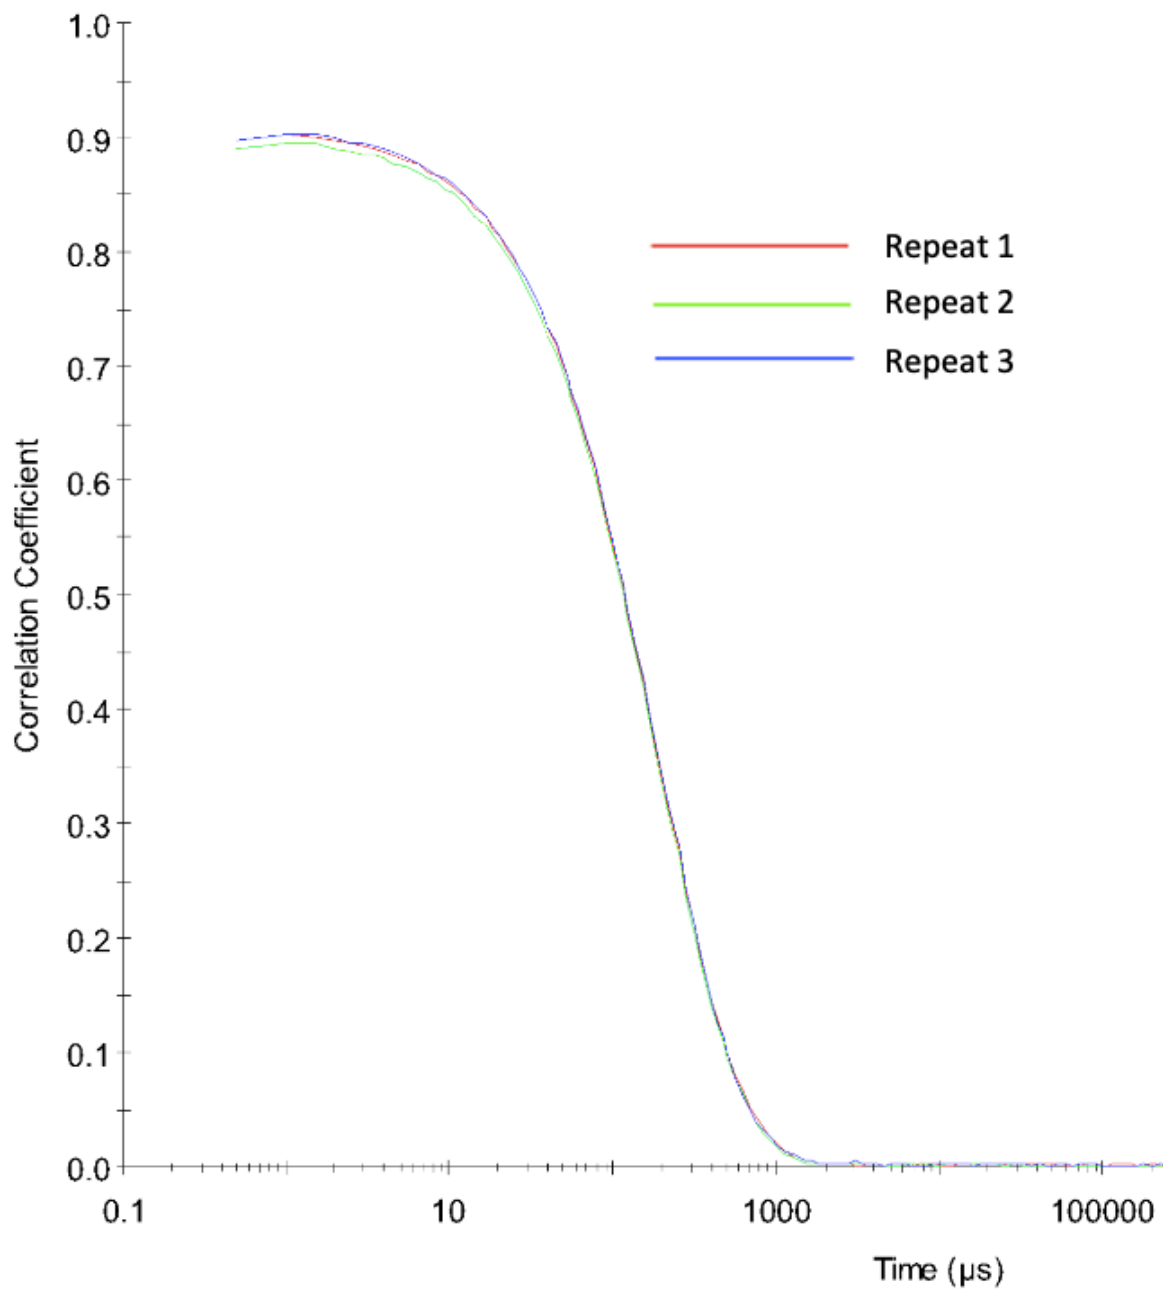

#### Appendix 1

Graph of time against correlation coefficient for 3 repeat measurements. It is a near perfect sigmoidal curve starting at 0.9 on the y-axis suggesting no aggregation of nanoparticles.
