# Supplementary material for: Impact of superparamagnetic iron oxide nanoparticles on in vitro and in vivo radiosensitisation of cancer cells
Source: PubMed Central journal article supplement (PMC8199842; doi:10.1186/s13014-021-01829-y), 2021-06-12
Supplement: 13014_2021_1829_MOESM3_ESM.pdf [file 13014_2021_1829_MOESM3_ESM.pdf]

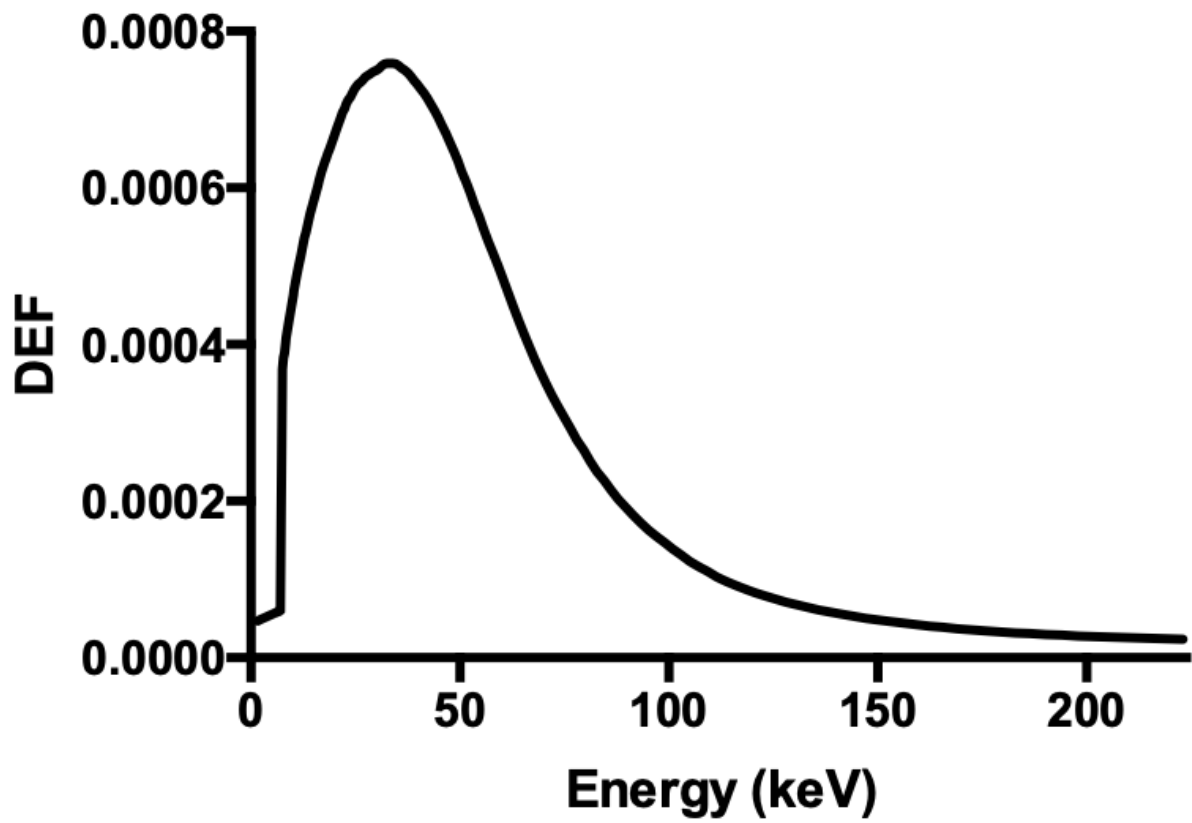

Appendix 3

Graph of energy against DEF for the range of energies in the x-ray spectrum used for *in vitro* experimentation.
